# Supplementary material for: Horizontally Acquired Glycosyltransferase Operons Drive Salmonellae Lipopolysaccharide Diversity
Source: PubMed Central journal article supplement (PMC3688519; doi:10.1371/journal.pgen.1003568), 2013-06-20
Supplement: pgen.1003568.s001.pdf [file pgen.1003568.s001.pdf]

|                      | OxyR (A)                                                                                                                             | OxyR (B)        | OxyR (C)                    |
|----------------------|--------------------------------------------------------------------------------------------------------------------------------------|-----------------|-----------------------------|
|                      | ATAGxTxxxAxCTAT                                                                                                                      | ATAGxTxxxAxCTAT | ATAGxTxxxAxCTAT             |
|                      | ** * * * *                                                                                                                           | *** ****        | ** * * *                    |
|                      | <u>GATC-1</u> <u>GATC-2</u>                                                                                                          |                 | <u>GATC-3</u> <u>GATC-4</u> |
|                      | *** * * * * *                                                                                                                        | *** * **** *    | ***** ** * * * * * *        |
| SeHA SL476_II        | -GCCCAATTGATCGGTAACAACGATCAATTAATAAGATAACAATAACTTTAAACTATTGAATACCACATTATTGATCGTTTATATCGATCAAAGCAATTTGTAGTGCTACACTCCAGACCTTCCGAA      |                 |                             |
| SEN P125109_I        | -GCCCAATTGATCGGTAACAACGATCAATTAATAAGATAACAATAACTTTAAACTATTGAATACCACATTATTGATCGTTTATATCGATCAAAGCAATTTGTAGTGCTACACTCCAGACCTTCCGAA      |                 |                             |
| STM LT2_I            | -GCCCAATTGATCGGTAACAACGATCAATTAATAAGATAACAATAACTTTAAACTATTGAATACCACATTATTGATCGTTTATATCGATCAAAGCAATTTGTAGTGCTACACTCCAGACCTTCCGAA      |                 |                             |
| STM D23580_II        | -GCCCAATTGATCGGTAACAACGATCAATTAATAAGATAACAATAACTTTAAACTATTGAATACCACATTATTGATCGTTTATATCGATCAAAGCAATTTGTAGTGCTACACTCCAGACCTTCCGAA      |                 |                             |
| STM DT104_II         | -GCCCAATTGATCGGTAACAACGATCAATTAATAAGATAACAATAACTTTAAACTATTGAATACCACATTATTGATCGTTTATATCGATCAAAGCAATTTGTAGTGCTACACTCCAGACCTTCCGAA      |                 |                             |
| STM 14028_I          | -GCCCAATTGATCGGTAACAACGATCAATTAATAAGATAACAATAACTTTAAACTATTGAATACCACATTATTGATCGTTTATATCGATCAAAGCAATTTGTAGTGCTACACTCCAGACCTTCCGAA      |                 |                             |
| STM DT2_I            | -GCCCAATTGATCGGTAACAACGATCAATTAATAAGATAACAATAACTTTAAACTATTGAATACCACATTATTGATCGTTTATATCGATCAAAGCAATTTGTAGTGCTACACTCCAGACCTTCCGAA      |                 |                             |
| STM SL1344_I         | -GCCCAATTGATCGGTAACAACGATCAATTAATAAGATAACAATAACTTTAAACTATTGAATACCACATTATTGATCGTTTATATCGATCAAAGCAATTTGTAGTGCTACACTCCAGACCTTCCGAA      |                 |                             |
| SG 287/91_I          | -GCCCAATTGATCGGTAACAACGATCAATTAATAAGATAACAATAACTTTAAACTATTGAATACCACATTATTGATCGTTTATATCGATCAAAGCAATTTGTAGTGCTACACTCCAGACCTTCCGAA      |                 |                             |
| SeSa CVM19633        | -GCCCAATTGATCGGTAACAACGATCAATTAATAAGATAACAATAAGTTTAAACTATCAAATATCACATTATTGATCGTTTATATCGATCAAAGCAATTTGTAGTGCTACACTCCAGACCTTCCGAA      |                 |                             |
| STY CT18_I           | -GCTCCAATTGATCGGTAACAACGATCAATTAATAAGACAACAATAAGTTCAAGCTATCAAATATAACATTATTGATCGTTTATATCGAAAAAAGCAATTTGTAGTACTATACTCCAGACCTTCCGAA     |                 |                             |
| STY TY2_II           | -GCTCCAATTGATCGGTAACAACGATCAATTAATAAGACAACAATAAGTTCAAGCTATCAAATATAACATTATTGATCGTTTATATCGAAAAAAGCAATTTGTAGTACTATACTCCAGACCTTCCGAA     |                 |                             |
| SPB                  | -GCCTCAATCGATCGATAACAACGATCAATTAATAATATAACAATAAGTTTAAACTATCAAATATCACATTATTGATCGTTTATATCGATCAAATCAATTTGTAGTGCTACACTCCAGACCTTCCGAA     |                 |                             |
| SN SL254_I           | -GCCTCAATCGATCGGTAACAACGATCAATTAATAATATAACAATAAGTTTAAACTATCAAATATCACATTATTGATCGTTTATATCGATCAAATCAATTTGTAGTGCTACACTCCAGACCTTCCGAA     |                 |                             |
| SeAg SL483_I         | -GCCTCAATCGATCGGTAACAACGATCAATTAATAACATAACAATAAGTTTAAACTATCAAATATCACATTATTGATCGTTTATATCGATCAAATCAATTTGTAGTGCTACACTCCAGACCTTCCGAA     |                 |                             |
| SCH SCB67_III        | -GCCTCAATCGATCGGTAACAACGATCAATTAATAATATAACAATAAGTTTAAACTATCAAATATCACATTATTGATCGTTTATATCGATCAAAGCAATTTGTAGTGCTACACTCCAGACCTTCCGAA     |                 |                             |
| SPC RKS4594_II       | -GCCTCAATCGATCGGTAACAACGATCAATTAATAATATAACAATAAGTTTAAACTATCAAATATCACATTATTGATCGTTTATATCGATCAAAGCAATTTGTAGTGCTACACTCCAGACCTTCCGAA     |                 |                             |
| SIN S1326/28_II      | -ATACCTATTGATCGGTAACAACGATCAATTAATAATATAACAATAAGTTTAAACTATCAAATATCACATTATTGATCGTTTATATCGATCAAAGCAATTTGTAGTGTTACACTCCAGACCTTCCGAA     |                 |                             |
| SHAD 18_I            | -ATACCTATTGATCGGTAACAACGATCAATTAATAATATAACAATAAGTTTAAACTATCAAATATCACATTATTGATCGTTTATATCGATCAAATCAATTTGTAGTGCTACACTCCAGACCTTCCGAA     |                 |                             |
| Phi ST104            | -ATAAAAATCGATCGGTAACAACGATCAATTAACGAGCAACAATAACTTTAAACTATCAAAGTTTACATTATTGATCGTTTATATCGATCAAAGTAATTTGTAGTGCTACACTCCAGACCTTCCGAA      |                 |                             |
| STM DT104_I          | -ATAAAAATCGATCGGTAACAACGATCAATTAACGAGCAACAATAACTTTAAACTATCAAAGTTTACATTATTGATCGTTTATATCGATCAAAGTAATTTGTAGTGCTACACTCCAGACCTTCCGAA      |                 |                             |
| Phi ST64T            | -ATAAAAATCGATCGGTAACAACGATCAATTAACGAGCAACAATAACTTTAAACTATCAAAGTTTACATTATTGATCGTTTATATCGATCAAAGCAATTTGTAGTGCTACACTCCAGACCTTCCGAA      |                 |                             |
| SPA 9150_II          | -ATAAAAATCGATCGGTAACAACGATCAATTAACGCGCAACAATAACTTTAAACTATCAAAGATTACATTATTGATCGTTTATATCGATCAAAGCAATTTGTAGTGCTACACTCCAGACCTTCCGAA      |                 |                             |
| SPA 9150_III         | -ATAAAAATCGATCGGTAACAACGATCAATTAACGCGCAACAATAACTTTAAACTATCAAAGATTACATTATTGATCGTTTATATCGATCAAAGCAATTTGTAGTGCTACACTCCAGACCTTCCGAA      |                 |                             |
| SPA 12601_II         | -ATAAAAATCGATCGGTAACAACGATCAATTAACGCGCAACAATAACTTTAAACTATCAAAGATTACATTATTGATCGTTTATATCGATCAAAGCAATTTGTAGTGCTACACTCCAGACCTTCCGAA      |                 |                             |
| SPA 12601_III        | -ATAAAAATCGATCGGTAACAACGATCAATTAACGCGCAACAATAACTTTAAACTATCAAAGATTACATTATTGATCGTTTATATCGATCAAAGCAATTTGTAGTGCTACACTCCAGACCTTCCGAA      |                 |                             |
| SeD CT02021853_I     | -ATACCTATTGATCGGTAACAGCGATCAATTAACGAGCAACAATAACTTTAAACTATCAAAGTTTACATTATTGATCGTTTATATCGATCAAAGCAATTTGTAGTGCTACACTCCAGACCTTCCGAA      |                 |                             |
| SeD CT02021853_II    | -ATACCTATTGATCGGTAACAGCGATCAATTAACGAGCAACAATAACTTTAAACTATCAAAGTTTACATTATTGATCGTTTATATCGATCAAAGCAATTTGTAGTGCTACACTCCAGACCTTCCGAA      |                 |                             |
| SPA 9150_I           | -ATACCAATTGATCGGTAATATCGATCAATATATTA AAAACTCAATAGCTTAAA ACTATTA AAAATACAATTATTGATCGTTTATATCGATCAAACCAATTTGTAGTGCTACACTCCAGACCTTCTGAA |                 |                             |
| SPA 12601_I          | -ATACCAATTGATCGGTAATATCGATCAATATATTA AAAACTCAATAGCTTAAA ACTATTA AAAATACAATTATTGATCGTTTATATCGATCAAACCAATTTGTAGTGCTACACTCCAGACCTTCTGAA |                 |                             |
| STY CT18_II          | -ATACCAATTGATCGGTAATATCGATCAATATATTA AAAACTCAATAGCTTAAA ACTATTA AAAATACAATTATTGATCGTTTATATCGATCAAACCAATTTGTAGTGCTACACTCCAGACCTTCTGAA |                 |                             |
| STY TY2_I            | -ATACCAATTGATCGGTAATATCGATCAATATATTA AAAACTCAATAGCTTAAA ACTATTA AAAATACAATTATTGATCGTTTATATCGATCAAACCAATTTGTAGTGCTACACTCCAGACCTTCTGAA |                 |                             |
| SEN P125109_II       | -ATACCAATTGATCGGTAATATCGATCAATATATTA AAAACTCAATAGCTTAAA ACTATTA AAAATACAATTATTGATCGTTTATATCGATCAAACCAATTTGTAGTGCTACACTCCAGACCTTCTGAA |                 |                             |
| SG 287/91_II         | -ATACCAATTGATCGGTAATATCGATCAATATATTA AAAACTCAATAGCTTAAA ACTATTA AAAATACAATTATTGATCGTTTATATCGATCAAACCAATTTGTAGTGCTACACTCCAGACCTTCTGAA |                 |                             |
| SeDu CT02021853_III  | -ATACCAATTGATCGGTAATATCGATCAATATATTA AAAACTCAATAGCTTAAA ACTATTA AAAATACAATTATTGATCGTTTATATCGATCAAACCAATTTGTAGTGCTACACTCCAGACCTTCTGAA |                 |                             |
| SCH SCB67_II         | -ATATCAATCTATCTATTTTAAACAATCAATTAAGTAATTACTATATGTA AAAACTATTA AACAAATGATTATTGATCGTTTATATCGATCAAAGCAATTTGTAGTGCTACACTCCAGACCTTCCGAA   |                 |                             |
| SPC RKS4594_I        | -ATATCAATCTATCTATTTTAAACAATCAATTAAGTAATTACTATATGTA AAAACTATTA AACAAATGATTATTGATCGTTTATATCGATCAAAGCAATTTGTAGTGCTACACTCCAGACCTTCCGAA   |                 |                             |
| SIN S1326/28_I       | -ATATCAACCTATCGATTGCAACGATCGATTAAATGTTGATGATGTTGTAAGCTATCAAACATGATTATTGATCGTTTATATCGATCAAATCAATTTGTAGTGCTACACTCCAGACCTTCCGAA         |                 |                             |
| Phi P22              | -ATAAAAATCGATCGGTAACAACGATCAATTAACATGCAATTAATAGATA AAAACTATCAAATTATACATTATTGATCGTTTATATCGATCAAACCAATTTGTAGTGCTACACTCCAGACCTTCCGAA    |                 |                             |
| SeHA SL476_I         | -ATAAAAATCGATCGGTAACAACGATCAATTAACATGCAATTAATAGATA AAAACTATCAAATTATACATTATTGATCGTTTATATCGATCAAACCAATTTGTAGTGCTACACTCCAGACCTTCCGAA    |                 |                             |
| S. bongori IP1387/73 | -CTAAAGATTGATCGATATCAACGATCAATCAACCAATTTTATAATAGCTATAAACTATCTTATATTGCATTATTGATCGTTAATATCGATCAAAGCAATTTGTAATGCTACACTCCAGACCTTCTGAA    |                 |                             |
| S. bongori IP4327/84 | -CTAAAGATTGATCGATATTAACGATCAATCAACCAATTTTATAATAGCTATAAACTATCTTATATTGCATTATTGATCGTTAATATCGATCAAAGCAATTTGTAATGCTACACTCCAGACCTTCTGAA    |                 |                             |
| S. bongori IP4770/84 | AATAAAG-CTGATCGATATTAACGATCAATGACCATTTTATAATAGGCAATACTATCTTATATCACATTATTGATCGTTAATATCGATCAAAGCAATTTGTAATGCTACACTCCAGACCTTCTGAA       |                 |                             |

Figure S1.
