# Supplementary material for: Horizontally Acquired Glycosyltransferase Operons Drive Salmonellae Lipopolysaccharide Diversity
Source: PubMed Central journal article supplement (PMC3688519; doi:10.1371/journal.pgen.1003568), 2013-06-20
Supplement: pgen.1003568.s002.pdf [file pgen.1003568.s002.pdf]

**Table S1.**

| <i>S. enterica</i> serovar and strain <sup>^</sup> | Kaufmann-White Serogroup <sup>\$</sup> | Genome accession number | <i>gtr</i> genome coordinates (operon) | <i>gtr</i> genome orientation | Genome systematic ID's + | Assigned Gtr operon acronym <sup>@</sup> |
|----------------------------------------------------|----------------------------------------|-------------------------|----------------------------------------|-------------------------------|--------------------------|------------------------------------------|
| Paratyphi A<br>ATCC_9150                           | Group A                                | CP000026                | 540234-540923                          | gtrCB*A                       | SPA 0469- 0467           | 9150_I                                   |
|                                                    |                                        |                         | 2256846-2259761                        | gtrABC*                       | SPA 2167- 2169*          | 9150_II                                  |
|                                                    |                                        |                         | 2486780-2489515                        | gtrABC                        | SPA 2385-2387            | 9150_III                                 |
| Paratyphi A<br>AKU_12601                           | Group A                                | FM200053                | 538409-540957                          | gtrCB*A                       | SSPA 0434- 0432          | 12601_I                                  |
|                                                    |                                        |                         | 2252030-2254945                        | gtrABC*                       | SSPA 2016-<br>SSPA 2017a | 12601_II                                 |
|                                                    |                                        |                         | 2482316-2485051                        | gtrABC                        | SSPA 2224- 2226          | 12601_III                                |
| Typhimurium LT2                                    | Group B                                | AE006468                | 614807-617722                          | gtrCBA                        | STM 0559- 0557           | LT2_I                                    |
|                                                    |                                        |                         | 4424449-4427281                        | gtrCBA                        | STM 4206-4204            | LT2_II                                   |
| Typhimurium<br>14028s                              | Group B                                | CP001363                | 615501-618416                          | gtrCBA                        | STM14 0650-<br>0652      | 14028s_I                                 |
|                                                    |                                        |                         | 4437988-4440820                        | gtrCBA                        | STM14 5056-<br>5054      | 14028s_II                                |
| Typhimurium<br>DT104                               | Group B                                | N/A                     | 403911-406646                          | gtrCBA                        | SDT 0361- 0363           | DT104_I                                  |
|                                                    |                                        |                         | 638657-641572                          | gtrCBA                        | SDT 0583- 0585           | DT104_II                                 |
|                                                    |                                        |                         | 4501354-4504186                        | gtrCBA                        | SDT 4190- 4192           | DT104_III                                |
| Typhimurium<br>D23580                              | Group B                                | FN424405                | 406441-408710                          | gtrCA*                        | STMMW 03911-<br>03921    | D23580_BTP1                              |

|                            |                      |          |                     |         |                       |            |
|----------------------------|----------------------|----------|---------------------|---------|-----------------------|------------|
|                            |                      |          | 653614-<br>656532   | gtrCBA  | STMMW 06231-<br>06251 | D23580_II  |
|                            |                      |          | 4447157-<br>4449989 | gtrCBA  | STMMW 41531-<br>41551 | D23580_III |
| Typhimurium<br>SL1344      | Group B              | FQ312003 | 614295-<br>617210   | gtrCBA  | SL 0547- SL0549       | SL1344_I   |
|                            |                      |          | 4445738-<br>4448570 | gtrCBA  | SL 4139- 4141         | SL1344_II  |
| Typhimurium DT2            | Group B              | N/A      | 614791-<br>617706   | gtrCBA  | DT2 05511-<br>05491   | DT2_I      |
|                            |                      |          | 4382759-<br>4385591 | gtrCBA  | DT2 40551-<br>40531   | DT2_II     |
| Heidelberg SL476           | Group B              | CP001120 | 413031-<br>415766   | gtrABC  | SeHA C0414-<br>0416   | SL476_I    |
|                            |                      |          | 663237-<br>666152   | gtrCBA  | SeHA C0669-<br>0667   | SL476_II   |
|                            |                      |          | 4420397-<br>4423229 | gtrCBA  | SeHA C4543-<br>C4541  | SL476_III  |
| Schwarzengrund<br>CVM19633 | Group B              | CP001127 | 699407-<br>700284   | gtrCBA  | SeSA A0725-<br>A0723  | CVM19633   |
| Agona SL483                | Group B              | CP001138 | 597653-<br>600568   | gtrCBA  | SeAg B0604-<br>0602   | SL483_I    |
|                            |                      |          | 4344080-<br>4346912 | gtrCBA  | SeAg B4459-<br>4457   | SL483_II   |
| Paratyphi B SPB7           | Group B              | CP000886 | 2500338-<br>2503252 | gtrABC  | SPAB 03002-<br>03004  | SPB7       |
| Choleraesuis SC-<br>B67    | Group C <sub>1</sub> | AE017220 | 410262-<br>412636   | gtrCBA  | SCH 0368- 0370        | SCB67_I    |
|                            |                      |          | 660997-<br>663862   | gtrABC  | SCH 0592- 0594        | SCB67_II   |
|                            |                      |          | 665196-<br>667922   | gtrCBA  | SCH 0595- 0597        | SCB67_III  |
|                            |                      |          | 4359067-<br>4361899 | gtrC*BA | SCH PS147*-<br>4085   | SCB67_IV   |

|                     |                      |          |                 |         |                    |              |
|---------------------|----------------------|----------|-----------------|---------|--------------------|--------------|
| Infantis S1326/28   | Group C <sub>1</sub> | N/A      | 623726-626452   | gtrABC  | SIN 05331-05351    | S1326/28_I   |
|                     |                      |          | 627786-630651   | gtrCBA  | SIN 05381-05401    | S1326/28_II  |
|                     |                      |          | 4312816-4315648 | gtrCBA  | SIN 38151-38171    | S1326/28_III |
| Paratyphi C RKS4594 | Group C <sub>1</sub> | CP000857 | 609844-612471   | gtrABC  | SPC 0569- 0571     | RKS4594_I    |
|                     |                      |          | 614418-616768   | gtrCBA  | SPC 0578- 0576     | RKS4594_II   |
|                     |                      |          | 4354486-4357318 | gtrCBA  | SPC 4266-4264      | RKS4594_III  |
| Newport SL254       | Group C <sub>2</sub> | CP001113 | 619047-622131   | gtrCBA  | SNSL254 A0609-0607 | SL254_I      |
|                     |                      |          | 4415618-4418450 | gtrCBA  | SNSL254 A4544-4542 | SL254_II     |
| Hadar 18            | Group C <sub>2</sub> | N/A      | 628402-631489   | gtrCBA  | SHAD 05371-05391   | SHAD18_I     |
|                     |                      |          | 4366513-4369345 | gtrCBA  | SHAD 38781-38801   | SHAD18_II    |
| Typhi TY2           | Group D <sub>1</sub> | AE014613 | 540204-542752   | gtrCB*A | t0468- 0466        | TY2_I        |
|                     |                      |          | 2371423-2374338 | gtrABC  | t2303- 2305        | TY2_II       |
| Typhi CT18          | Group D <sub>1</sub> | AL513382 | 606763-609678   | gtrCBA  | STY 0607- 0605     | CT18_I       |
|                     |                      |          | 2461960-2464508 | gtrAB*C | STY 2627a- 2629    | CT18_II      |
| Enteritidis P125109 | Group D <sub>1</sub> | AM933172 | 594265-597180   | gtrCBA  | SEN 0537- 0535     | P125109_I    |
|                     |                      |          | 2501054-2503603 | gtrABC  | SEN 2376- 2378     | P125109_II   |
| Gallinarum 287/91   | Group D <sub>1</sub> | AM933173 | 614286-615553   | gtrCBA  | SG 0569- 0567      | 287/91_I     |

|                       |                      |          |                     |        |                 |                |
|-----------------------|----------------------|----------|---------------------|--------|-----------------|----------------|
|                       |                      |          | 2491925-<br>2494474 | gtrABC | SG 2427- 2429   | 287/91_II      |
| Dublin<br>CT_02021853 | Group D <sub>1</sub> | CP001144 | 655577-<br>658312   | gtrCBA | SeD A0656- 0654 | CT02021853_I   |
|                       |                      |          | 659799-<br>662714   | gtrCBA | SeD A0660- 0658 | CT02021853_II  |
|                       |                      |          | 2628156-<br>2630705 | gtrABC | SeD A2750- 2751 | CT02021853_III |

FOOTNOTES:

N/A: Not available. Genome sequences are freely available for BLAST analyses (<http://www.sanger.ac.uk/cgi-bin/blast/submitblast/salmonella>)

^ An additional 34 genome sequences representing non-*S. enterica* subsp. *enterica* serovars (subspecies I) were analyzed: The genomes constitute the complete genome of *S. bongori* strain 12419 (accession number FR877557) and 28 draft *S. bongori* strains representing 8 different O-serotypes (Table S2, [37]); *S. enterica* subsp. *salamae* (subspecies II); *S. enterica* subsp. *arizonae* str. RSK2980 (accession CP000880- subspecies IIIa); *S. enterica* subsp. *diarizonae* str. CDC 01-0005 (subspecies IIIb); *S. enterica* subsp. *houtenae* (subspecies IV); *S. enterica* subsp. *indica* (subspecies V). Draft genome sequences are publically available from The Wellcome Trust Sanger Institute or The Genome Institute at Washington University.

+ As assigned by original publication.

\* Contain a possible frameshift mutation or deletion that may render the product non-functional.

\$ According to the Kauffman-White scheme [1], [2].

@ In order to reduce unnecessary over-representation of identical sequences, the *gtr* operons from the six *S. Typhimurium* (STM) strains represented in this study (LT2, 14028s, SL1344, D23580, DT2 and DT104) were annotated collectively as STM+\_I and STM+\_II in Figure 1.
