# Supplementary material for: Horizontally Acquired Glycosyltransferase Operons Drive Salmonellae Lipopolysaccharide Diversity
Source: PubMed Central journal article supplement (PMC3688519; doi:10.1371/journal.pgen.1003568), 2013-06-20
Supplement: pgen.1003568.s003.pdf [file pgen.1003568.s003.pdf]

**Table S2.**

| <b>Strain Name</b> | <b>SRA sample submission*</b> | <b>Kaufmann-White<sup>§</sup> serotype</b> | <b>Kaufmann-White<sup>§</sup> serogroup</b> | <b><i>gtr</i> operon present (Y/N)</b> |
|--------------------|-------------------------------|--------------------------------------------|---------------------------------------------|----------------------------------------|
| RKI-1593           | ERS004192                     | O66:z65:-                                  | O:66                                        | N                                      |
| CDC-2703-76        | ERS004191                     | O48:z41:-                                  | Y (O:48)                                    | N                                      |
| IP7688/91          | ERS002039                     | O66:z39:-                                  | O:66                                        | N                                      |
| 285 CT             | ERS004193                     | O48:z35:-                                  | Y (O:48)                                    | N                                      |
| CEIM 44847         | ERS004249                     | O48:z35:-                                  | Y (O:48)                                    | N                                      |
| CEIM 44833         | ERS004196                     | O48:z35:-                                  | Y (O:48)                                    | N                                      |
| RKI-1373           | ERS004176                     | O60:z41:-                                  | O:60                                        | N                                      |
| 12419 (ATCC 43975) | EMBL accession no. FR877557   | O66:z35:-                                  | O:66                                        | N                                      |
| RKI-1397           | ERS004190                     | O66:z35:-                                  | O:66                                        | N                                      |
| RKI-1398           | ERS004173                     | O66:z65:-                                  | O:66                                        | N                                      |
| IP1900/76          | ERS004246                     | O66:z35:-                                  | O:66                                        | N                                      |
| RKI-1786           | ERS004174                     | O66:z81:-                                  | O:66                                        | N                                      |
| RKI-1300           | ERS004170                     | O48:z35:-                                  | Y (O:48)                                    | N                                      |
| CEIM 46049         | ERS004175                     | O48:z35:-                                  | Y (O:48)                                    | N                                      |
| IP6031/93          | ERS002041                     | O13,22:r:-                                 | G (O:13)                                    | N                                      |
| IP0224/66          | ERS002029                     | O48:z39:-                                  | Y (O:48)                                    | N                                      |

|           |           |              |          |   |
|-----------|-----------|--------------|----------|---|
| IP1387/73 | ERS002030 | O1,40:z81:-  | R (O:40) | Y |
| IP2022/77 | ERS002031 | O44:r:-      | V (O:44) | N |
| IP3846/83 | ERS002032 | O44:z39:-    | V (O:44) | N |
| IP4327/84 | ERS002033 | O1,40:z35:-  | R (O:40) | Y |
| IP6794/89 | ERS002038 | O48:b:-      | Y (O:48) | N |
| IP4504/84 | ERS002034 | O48:z81:-    | Y (O:48) | N |
| IP4770/84 | ERS002035 | O1,13,22:i:- | G (O:13) | Y |
| IP4985/85 | ERS002036 | O48:z39:-    | Y (O:48) | N |
| IP5713/87 | ERS002037 | O61:z35:-    | O:61     | N |
| IP7804/92 | ERS002040 | O48:z65:-    | Y (O:48) | N |
| IP9325/02 | ERS002044 | O13,22:z39:- | G (O:13) | N |
| IP8365/95 | ERS002042 | O48:i:-      | Y (O:48) | N |

+ *S. bongori* genome sequences as defined by [37].

\* SRA: Short read archive. Available for download at the European Nucleotide Archive <http://www.ebi.ac.uk/ena/>

<sup>§</sup> Kaufmann-White refers to the Kaufmann-White-Le Minor *Salmonella* classification scheme [1], [2].
