# Supplementary material for: Horizontally Acquired Glycosyltransferase Operons Drive Salmonellae Lipopolysaccharide Diversity
Source: PubMed Central journal article supplement (PMC3688519; doi:10.1371/journal.pgen.1003568), 2013-06-20
Supplement: pgen.1003568.s004.pdf [file pgen.1003568.s004.pdf]

**Table S3.**

| <b>Primer name</b>                                       | <b>Primer sequence (5' – 3')</b>                                           | <b>Description</b>                                                                                                                                                     |
|----------------------------------------------------------|----------------------------------------------------------------------------|------------------------------------------------------------------------------------------------------------------------------------------------------------------------|
| <b>Primer sequences used for lambda red mutagenesis*</b> |                                                                            |                                                                                                                                                                        |
| oMV442kan                                                | TATTTCCGTAATATTCTCATTTGTCCTCGCCCCTGTT<br>CTAACGTCCCATGTgttaggctggagctgcttc | <i>gtrC</i> primer for allelic replacement of <i>S. Infantis gtrS1326/28_III</i> and <i>S. Typhimurium gtrSTM_II</i> (GtrC Family IV) with kanamycin.                  |
| oMV444kan                                                | ATTAGTCCCTTTTCGCGCGCTATTTCCGATGAAAAT<br>GTAATCACTTTGCGattccgggatccgctgacc  | <i>gtr</i> regulatory region primer for allelic replacement of <i>S. Infantis gtrS1326/28_III</i> and <i>S. Typhimurium gtrSTM_II</i> (GtrC Family IV) with kanamycin. |
| oMV728tetR                                               | GACCTTTCCGAATCCGCTGATTTTCATAATGTTGAA<br>GTTATTCGCTttaagaccactttcacatt      | <i>gtr</i> regulatory region primer for allelic replacement of <i>S. Infantis gtrS1326/28_I</i> (GtrC Family V) with tetracycline.                                     |
| oMV730tetA                                               | GAATTATGGACAGGCTCCTTGTTGACTACTCTATAA<br>CAATCCTTGCctaagcacttgtctcctg       | <i>gtrC</i> primer for allelic replacement of <i>S. Infantis gtrS1326/28_I</i> (GtrC Family V) with tetracycline.                                                      |
| oMV731                                                   | AGGCTCCTTGTTGACTACTCTATAACAATCCTTGCA<br>GCGAATAACTTCAACATTATGAAAATCAGCGGAT | Replacement of tetRA cassette from <i>S. Infantis gtrS1326/28_I::tetRA</i> (GtrC Family V)                                                                             |
| oMV735tetR                                               | ATTACAGTCTCTGAGGCGGAATTATAGTTAATTACA<br>CCTTAGGttaagaccactttcacatt         | <i>gtrC</i> primer for allelic replacement of <i>S. Infantis gtrS1326/28_II</i> (GtrC Family VI) with tetracycline.                                                    |
| oMV737tetA                                               | AACATGCAAAGCCTTGCAAACCAATGCAAAGCTTT<br>GTGTGTCCCgctaagcacttgtctcctg        | <i>gtr</i> regulatory region primer for allelic replacement of <i>S. Infantis gtrS1326/28_II</i> (GtrC Family VI) with tetracycline.                                   |
| oMV739                                                   | GCCTTGCAAACCAATGCAAAGCTTTGTGTGTCCC<br>CTAAGTGGTGTAATTAATAATTCCGCCTCAG      | Replacement of tetRA cassette from <i>S. Infantis gtrS1326/28_II::tetRA</i> (GtrC Family V)                                                                            |

|            |                                                                            |                                                                                                                                                                                              |
|------------|----------------------------------------------------------------------------|----------------------------------------------------------------------------------------------------------------------------------------------------------------------------------------------|
| oMV526tetR | GAACACCGATCGATGTGTACTTAGCGAATAACTTC<br>AACATttaaagaccactttcacatt           | <i>gtrA</i> primer for allelic replacement of <i>S. Infantis gtrS1326/28_II</i> regulatory region (GtrC Family VI) with tetracycline                                                         |
| oMV528pTac | GAACACCGATCGATGTGTACTTAGCGAATAACTTC<br>AACATgactggctgttctctgtg             | <i>gtrA</i> primer for allelic replacement of <i>S. Infantis gtrS1326/28_II</i> regulatory::tetRA (GtrC Family VI) with the pTac promoter.                                                   |
| oMV753pTac | AACATGCAAAGCCTTGCAAACCAATGCAAAGCTTT<br>GTGTGTCCCGgacatcataacggttctg        | <i>gtr</i> regulatory region primer for allelic replacement of <i>S. Infantis gtrS1326/28_II</i> regulatory::tetRA (GtrC Family VI) with the pTac promoter.                                  |
| oMV531tetR | GCAGTATTAAGTACGCCTATCGAAACGTACTTTATA<br>AATAATTTTATCATttaaagaccactttcacatt | <i>gtrA</i> primer for allelic replacement of <i>S. Infantis gtrS1326/28_III</i> regulatory region and <i>S. Typhimurium gtrSTM_II</i> (GtrC Family IV) with tetracycline.                   |
| oMV532tetA | GCTTCGCCTTATCCAGCCTGCAAAAGGTGCATAAA<br>CACCGgtaagcactgtctctg               | <i>gtr</i> regulatory region primer for allelic replacement of <i>S. Infantis gtrS1326/28_III</i> and <i>S. Typhimurium gtrSTM_II</i> regulatory region (GtrC Family IV) with tetracycline.  |
| oMV533pTac | GCAGTATTAAGTACGCCTATCGAAACGTACTTTATA<br>AATAATTTTATCATgactggctgttctctg     | <i>gtrA</i> primer for allelic replacement of <i>S. Infantis gtrS1326/28_III</i> <i>S. Typhimurium gtrSTM_II</i> regulatory::tetRA (GtrC Family IV) with the pTac promoter.                  |
| oMV534pTac | GCTTCGCCTTATCCAGCCTGCAAAAGGTGCATAAA<br>CACCGgacatcataacggttctg             | <i>gtr</i> regulatory region primer for allelic replacement of <i>S. Infantis gtrS1326/28_III</i> <i>S. Typhimurium gtrSTM_II</i> regulatory::tetRA (GtrC Family IV) with the pTac promoter. |
| oMV764tetR | GACTCGATATAAATGGGCTAAGAGCTTTTGCATTGA<br>TAAGTGTGTGCTGttaaagaccactttcacatt  | <i>oafA</i> 5' primer for allelic replacement of <i>oafA</i> with tetracycline.                                                                                                              |
| oMV765tetA | CCTGAGCCTTCTGGTGTAGGTGCGCATTGTCATAT<br>TGTATAGGGTAAGCgtaagcactgtctctg      | <i>oafA</i> 3' primer for allelic replacement of <i>oafA</i> with tetracycline.                                                                                                              |

|            |                                                                             |                                                                                                                                                                           |
|------------|-----------------------------------------------------------------------------|---------------------------------------------------------------------------------------------------------------------------------------------------------------------------|
| oMV766     | GGCTAAGAGCTTTTGCATTGATAAGTGTTGTGCTGG<br>CTTACCCTATAACAATATGACAATGCGCACCTAAC | <i>oafA</i> primer for allelic replacement of <i>oafA</i> :tetRA.                                                                                                         |
| oMV496tetR | TATTTCCGTAATATTCTCATTTGTCCTCGCCCCTGTT<br>CTAACGTCCCATGTttaagaccactttcacatt  | <i>gtrC</i> primer for allelic replacement of <i>S. Typhimurium gtrSTM_I</i> (GtrC Family III) with tetracycline.                                                         |
| oMV497tetA | TTGTCCCAAACACTTAGCAATCAGTAGCCCCAATT<br>GATCGGTAACAACGctaagcactgtctcctg      | <i>gtr</i> regulatory region primer for allelic replacement of <i>S. Typhimurium gtrSTM_I</i> (GtrC Family III) with tetracycline.                                        |
| oMV498     | CTCATTTGTCCTCGCCCCTGTTCTAACGTCCCATGTC<br>GTTGTTACCGATCAATTGGGGCTACTGATTGCTA | Replacement of tetRA cassette from <i>S. Typhimurium gtrSTM_I::tetRA</i> (GtrC Family III)                                                                                |
| oMV877tetR | AATTGCTGTAATTTACCTTTGTCTACAGAAGCGTA<br>GTACCAGAATTCATttaagaccactttcacatt    | <i>gtrC</i> primer for allelic replacement of <i>S. Infantis gtrS1326/28_III</i> and <i>S. Typhimurium gtrSTM_II</i> (GtrC Family IV) with tetracycline.                  |
| oMV877tetA | ATTAGTCCCTTTTCGCGCGCTATTTCCGATGAAAAT<br>GTAATCACTTTGCGctaagcactgtctcctg     | <i>gtr</i> regulatory region primer for allelic replacement of <i>S. Infantis gtrS1326/28_III</i> and <i>S. Typhimurium gtrSTM_II</i> (GtrC Family IV) with tetracycline. |
| oMV878     | ACCTTTGTCTACAGAAGCGTAGTACCAGAATTCATC<br>GCAAAGTGATTACATTTTCATCGGAAATAGCGC   | Replacement of tetRA cassette from <i>S. Infantis gtrS1326/28_III::tetRA</i> and <i>S. Typhimurium gtrSTM_II::tetRA</i> (GtrC Family IV).                                 |
| oMV439kan  | TATTTCCGTAATATTCTCATTTGTCCTCGCCCCTGTT<br>CTAACGTCCCATGTgtgtaggetggagctgcttc | <i>gtrC</i> primer for allelic replacement of <i>S. Typhimurium gtrSTM_II</i> (GtrC Family III) with kanamycin.                                                           |
| oMV441kan  | TTGTCCCAAACACTTAGCAATCAGTAGCCCCAATT<br>GATCGGTAACAACGattccgggatccgctcgacc   | <i>gtr</i> regulatory region primer for allelic replacement of <i>S. Typhimurium gtrSTM_II</i> (GtrC Family III) with kanamycin.                                          |
| oMV526tetR | GAACACCGATCGATGTGTACTTAGCGAATAACTTC<br>AACATttaagaccactttcacatt             | <i>gtrA</i> primer for allelic replacement of <i>S. Typhimurium STM_II</i> regulatory region (GtrC Family III) with tetracycline.                                         |

|            |                                                                |                                                                                                                                                            |
|------------|----------------------------------------------------------------|------------------------------------------------------------------------------------------------------------------------------------------------------------|
| oMV527tetA | CTTCGAAAAACATGCAAAGCCTTGCAAGCCGATGC<br>AAAGCctaagcacttgtctcctg | <i>gtr</i> regulatory region primer for allelic replacement of <i>S. Typhimurium gtrSTM_II</i> (GtrC Family III) with tetracycline.                        |
| oMV528pTac | GAACACCGATCGATGTGTACTTAGCGAATAACTTC<br>AACATgactggctgttctcctg  | <i>gtrA</i> primer for allelic replacement of <i>S. Typhimurium gtrSTM_II</i> regulatory::tetRA (GtrC Family III) with the pTac promoter.                  |
| oMV529pTac | CTTCGAAAAACATGCAAAGCCTTGCAAGCCGATGC<br>AAAGCgacatcataacggttctg | <i>gtr</i> regulatory region primer for allelic replacement of <i>S. Typhimurium gtrSTM_II</i> regulatory::tetRA (GtrC Family III) with the pTac promoter. |

**Primer sequences used for cloning and mutagenesis of *gtr* regulatory region- *lacZ* reporter fusion constructs (in order of strains Table 1)\*\***

|        |                                     |                                                                                                                     |
|--------|-------------------------------------|---------------------------------------------------------------------------------------------------------------------|
| oMV412 | catgatgtaccCTTCAACATTATGAAAATCAGCGG | R-primer regulatory region for generating <i>lacZ</i> fusion of sMV444, sMV445, sMV84, and sMV352; with Acc651 site |
| oMV846 | ggtagctctgcagAACCTCGACTTAGAAGTTTCTG | F-primer Regulatory region for <i>lacZ</i> fusion sMV444 with PstI site                                             |
| oMV848 | ggtagctctgcagCCCGCGGCTTAGATGTTCTGG  | F-primer Regulatory region for <i>lacZ</i> fusion sMV445 with PstI site                                             |
| oMV458 | catgatgtaccTTTTATCATTATAGCAATCA     | R-primer regulatory region for generating <i>lacZ</i> fusion of sMV446 and sMV521; with Acc651 site                 |
| oMV459 | ggtagctctgcagGCTTCGCCTTATCCAGCCTG   | F-primer Regulatory region for <i>lacZ</i> fusion sMV446, with PstI site                                            |
| oMV414 | ttgattcctgcagCCCACGGCTTAGATGTTCTGG  | F-primer Regulatory region for <i>lacZ</i> fusion sMV84 and sMV520 with PstI site                                   |

|        |                                                     |                                                                                                            |
|--------|-----------------------------------------------------|------------------------------------------------------------------------------------------------------------|
| oMV504 | AGCAATCAGTAGCCCCAATTCATCGGTAACAACGA                 | Mutagenic sense primer for GATC 1 mutation in regulatory region for <i>lacZ</i> fusion in sMV510           |
| oMV505 | TCGTTGTTACCGATGAATTGGGGCTACTGATTGCT                 | Mutagenic antisense primer for GATC 1 mutation in regulatory region for <i>lacZ</i> fusion in sMV511sMV510 |
| oMV514 | CAAACCACTTAGCAATCAGCAATAAAAATTCATCG<br>GTAACAACGATC | Mutagenic sense primer for GATC 1 mutation in regulatory region for <i>lacZ</i> fusion in SMV511           |
| oMV515 | GATCGTTGTTACCGATGAATTTTTATTGCTGATTGC<br>TAAGTGGTTTG | Mutagenic antisense primer for GATC 1 mutation in regulatory region for <i>lacZ</i> fusion in sMV511       |
| oMV413 | ggtagctctgcagCTTCGCATTACGAATTATAAGAAC               | F-primer Regulatory region for <i>lacZ</i> fusion sMV517 with PstI site                                    |
| oMV850 | catgatggtaccTGTAACAACACTATGAGTCCTTGGA               | R-primer regulatory region for generating <i>lacZ</i> fusion of sMV517, with Acc651 site                   |
| oMV852 | ggtagctctgcagCAATCTATCTATTTTAACAATCAATTTA<br>AG     | F-primer Regulatory region for <i>lacZ</i> fusion sMV518 with PstI site                                    |
| oMV851 | ggtagctctgcagAGTCCACGGCTTAGAAGTTTCTGTAACC<br>GCCG   | F-primer Regulatory region for <i>lacZ</i> fusion sMV520 with PstI site                                    |
| oMV459 | ggtagctctgcagGCTTCGCCTTATCCAGCCTG                   | F-primer Regulatory region for <i>lacZ</i> fusion sMV521 with PstI site                                    |

\* Lowercase primer sequences indicate homology to the amplified antibiotic marker used for knockout selection or the pTac promoter. Synonyms: Kan, kanamycin (as designed by [44]); tetR/A, tetracycline as designed by [46]. pTac: refers to the constitutive pTac promoter (116bp) [28] that was used for allelic replacement of the native *gtr* promoter.

\*\* Lowercase primer sequences indicate sequence added to include restriction enzyme recognition sequence.
